# Supplementary material for: In situsynthesis of poly(ether ester)viadirect polycondensation of terephthalic acid and 1,3-propanediol with sulfonic acids as catalysts
Source: Royal Society of Chemistry journal article supplement (doi:10.1039/c9py00550a), 2019-01-01
Supplement: c9py00550a1.pdf [file c9py00550a1.pdf]

Supporting information

**Cost-effective synthesis of poly(ether ester) via polycondensation of terephthalic acid and 1,3-propanediol at the sulfonic acids-participating catalysis**

Ziyao Gan, Dexian Bing, Shuang Qu, Shengyi Li, Tianwei Tan, Jing Yang\*

State Key Laboratory of Chemical Resource Engineering, Beijing Key Laboratory of Bioprocess, College of Life Science and Technology, Beijing University of Chemical Technology, Beijing 100029, China.

Corresponding address: yangj@mail.buct.edu.cn

**Synthesis of PTT.** All the operations were similar to the synthesis of PTT-co-PDPT-co-PTrMOT, except TPT (109 mg, 0.38 mmol) used only.

**Synthesis of dipropylene glycol.** The 1,3-PDO (8.56 g, 0.11 mol) was placed in a three-necked flask, and aqueous sodium hydroxide solution (46.4 wt%) was dropped into the 1,3-PDO under ice bath, followed by reacting for 30 min. Then, with rising to 100 °C, 3-chloro-1-propanol (10.40 g, 0.11 mol) was dropped into the above mixture, and the reaction lasted for 8 h. Then the mixture was dissolved in deionized water and transferred into a separating funnel, adding chloroform to extraction, and then through rotary evaporation (35 °C) to obtained a crude product. Finally the crude product was purified by silica gel column (chloroform and anhydrous methanol (v/v = 8/1)). The compound was isolated as light yellow liquid in a yield of 20 %. <sup>1</sup>H NMR (CDCl<sub>3</sub>, 500 MHz,  $\delta$  ppm): 3.75 (t,  $J$  = 5.7 Hz, 1H, CH<sub>2</sub>), 3.61 (t,  $J$  = 5.8 Hz, 1H, CH<sub>2</sub>), 1.90-1.78 (m, 4H, CH<sub>2</sub>).

**Synthesis of PDPT.** TPA (2.58 g, 0.016 mol), dipropylene glycol (3.9 g, 0.029 mol) and TPT (39 mg, 0.14 mmol) were added to the three-necked flask under N<sub>2</sub> atmosphere. Similar polycondensation operation was performed in the following. Finally, PDPT was dissolved in trichlorochloride, precipitated with ether, and dried under vacuum.

**Synthesis of oligo(trimethylene oxide).** 1,3-PDO (10 g, 0.13 mol) and MSA (133 mg, 1.38 mmol) were added to the three-necked flask, conducted at 220-240 °C for 4 h in N<sub>2</sub> atmosphere, and oligo(trimethylene oxide) will be obtained.

**Synthesis of PTrMOT.** TPA (5 g, 0.03 mol), oligoether (13.7 g, 0.054 mol) and TPT (112 mg, 0.40 mmol) were added to the three-necked flask under N<sub>2</sub> atmosphere. The esterification and polycondensation operation were identical to the synthesis of PTT-co-PDPT-co-PTrMOT. Finally, PTrMOT was dissolved in trichlorochloride, precipitated with ether, and dried under vacuum.

(a) Synthesis of oligo(trimethylene oxide)

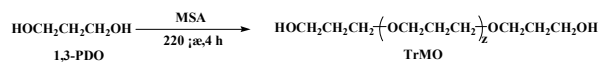

(b) Synthesis of PTrMOT

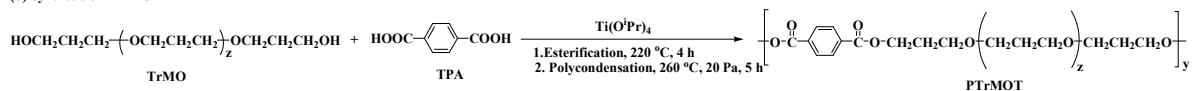

**Scheme S1.** (a) Synthetic route of oligo(trimethylene oxide). (b) Synthetic route of PTrMOT.

(a) Synthesis of dipropylene glycol

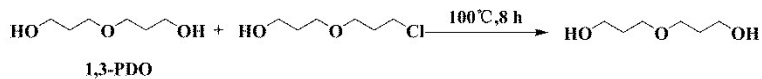

(b) Synthesis of PDPT

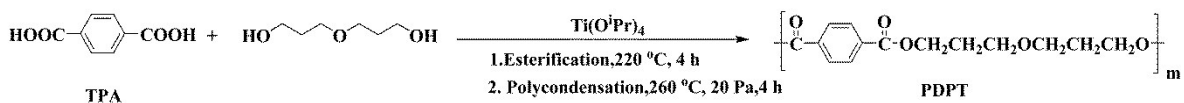

**Scheme S2.** (a) Synthetic route of dipropylene glycol. (b) Synthetic route of PDPT.

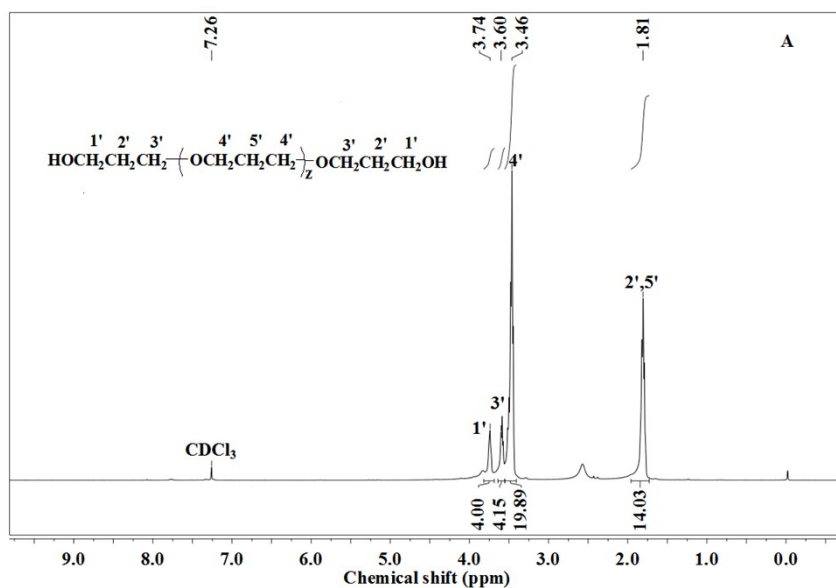

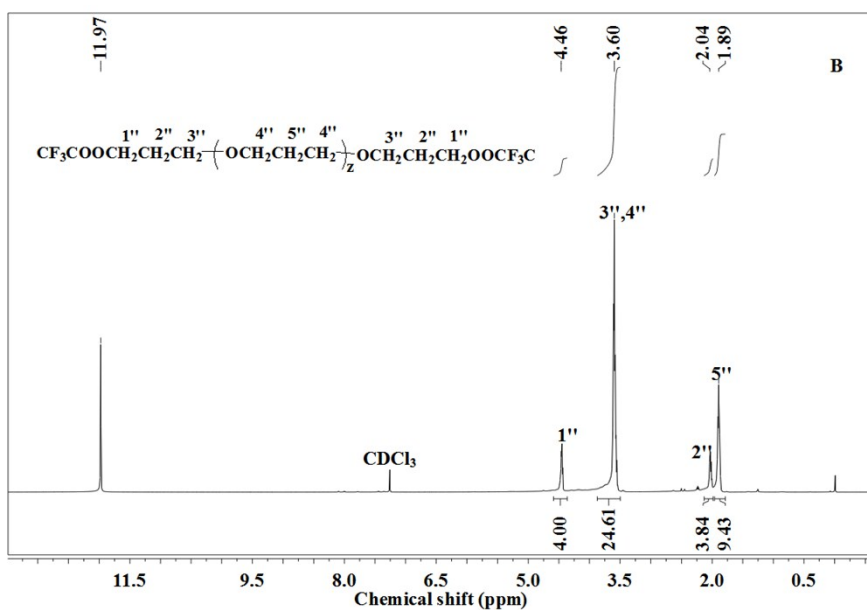

**Figure S1.** <sup>1</sup>H NMR spectra of oligo(trimethylene oxide) (A) and after adding one droplet of trifluoroacetic anhydride (B).

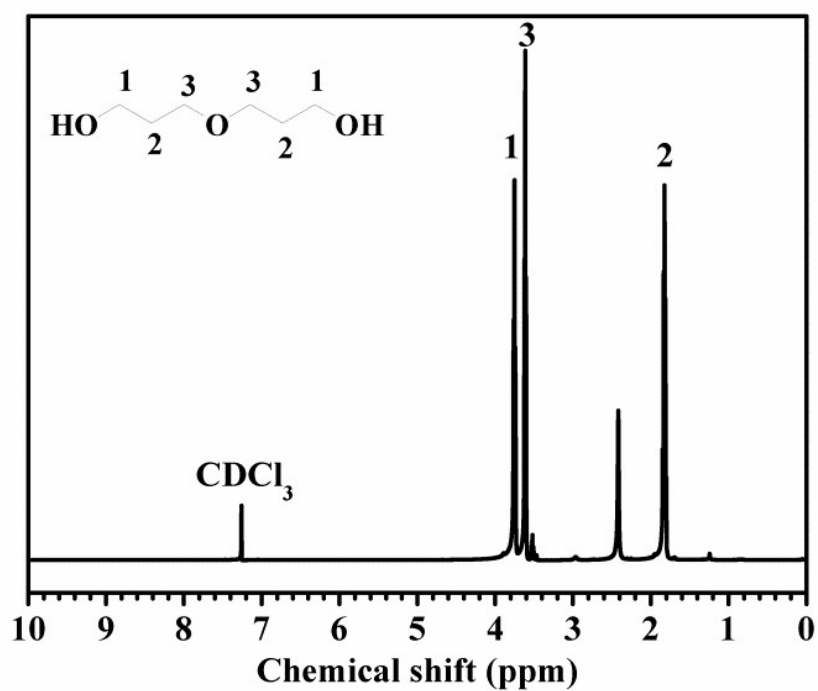

**Figure S2.** <sup>1</sup>H NMR spectrum of PDPT.

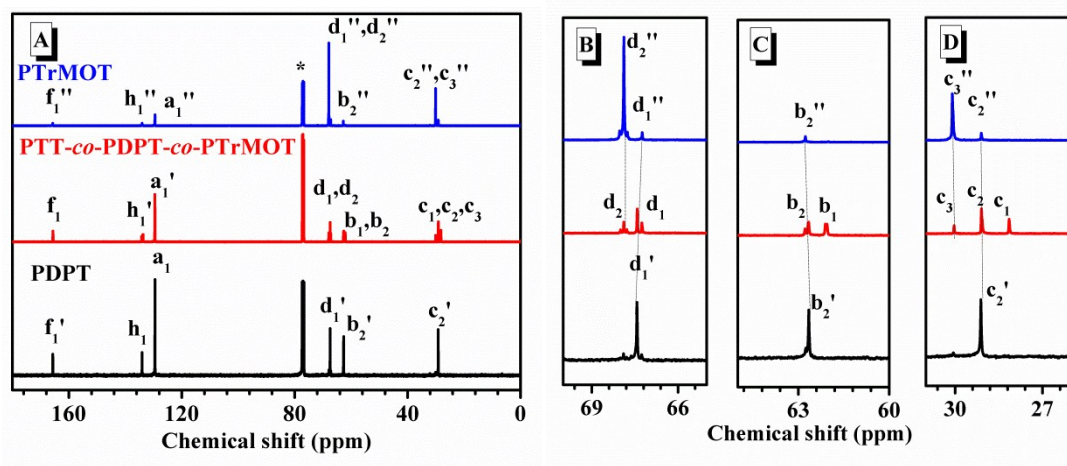

**Figure S3.**  $^{13}\text{C}$  NMR spectra of PDPT, PTrMOT and PTT-*co*-PDPT-*co*-PTrMOT (P-2). The peaks marked as asterisk were  $\text{CDCl}_3$ .

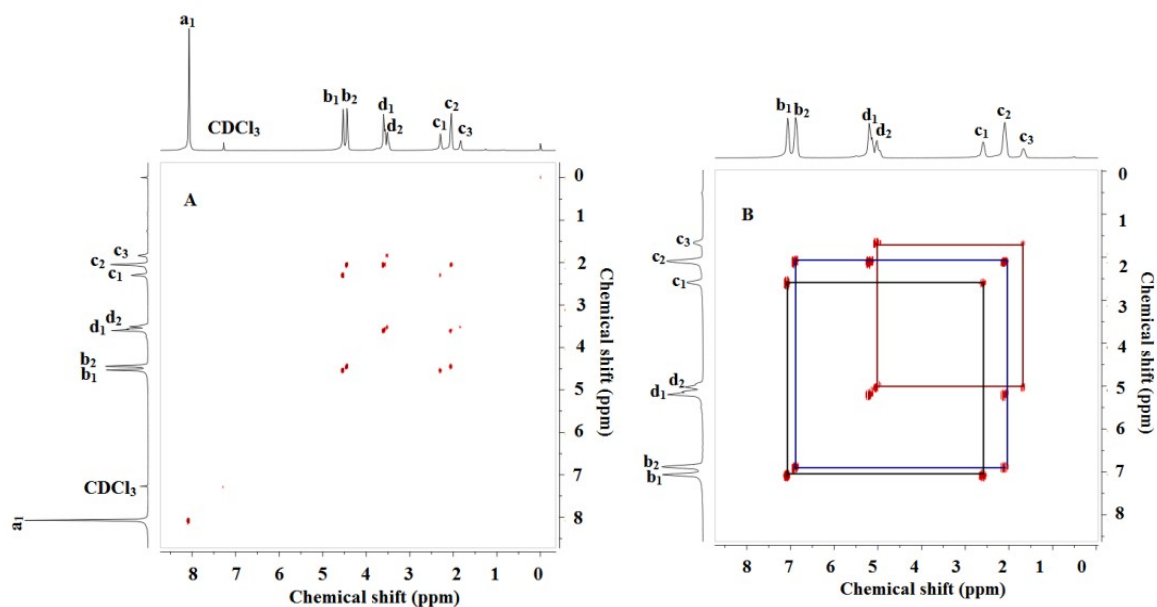

**Figure S4.** Two dimensional  $^1\text{H}$ - $^1\text{H}$  gCOSY spectra of PTT-*co*-PDPT-*co*-PTrMOT obtained via direct polycondensation of TPA and PDO in the presence of MSA. (A) the whole spectrum; (B) the selected enlarged correlated regions.

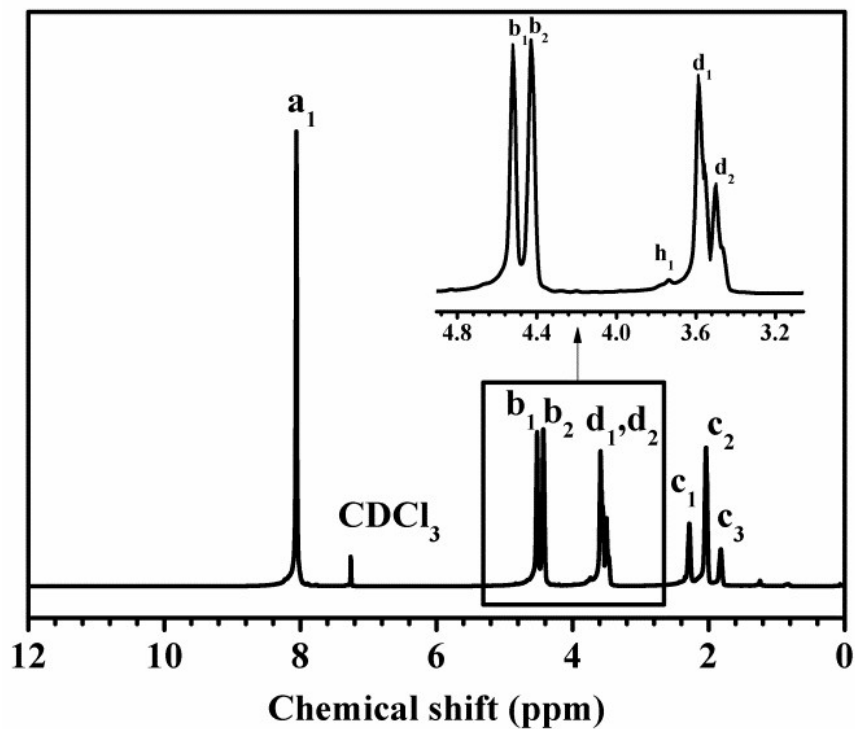

Figure S5. 1D  $^1\text{H}$  NMR spectrum of P-2.

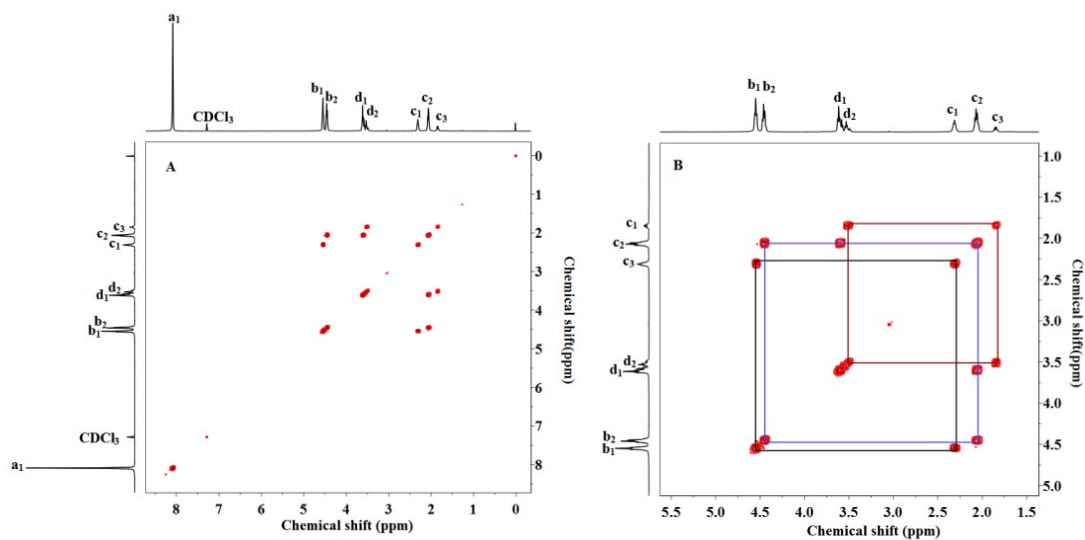

Figure S6. Two dimensional  $^1\text{H}$ - $^1\text{H}$  gCOSY spectra of P-3 obtained at the catalysis of TSA and MSA with feeding ratios of 1 to 1. (A) the whole spectrum; (B) the selected enlarged correlated regions.

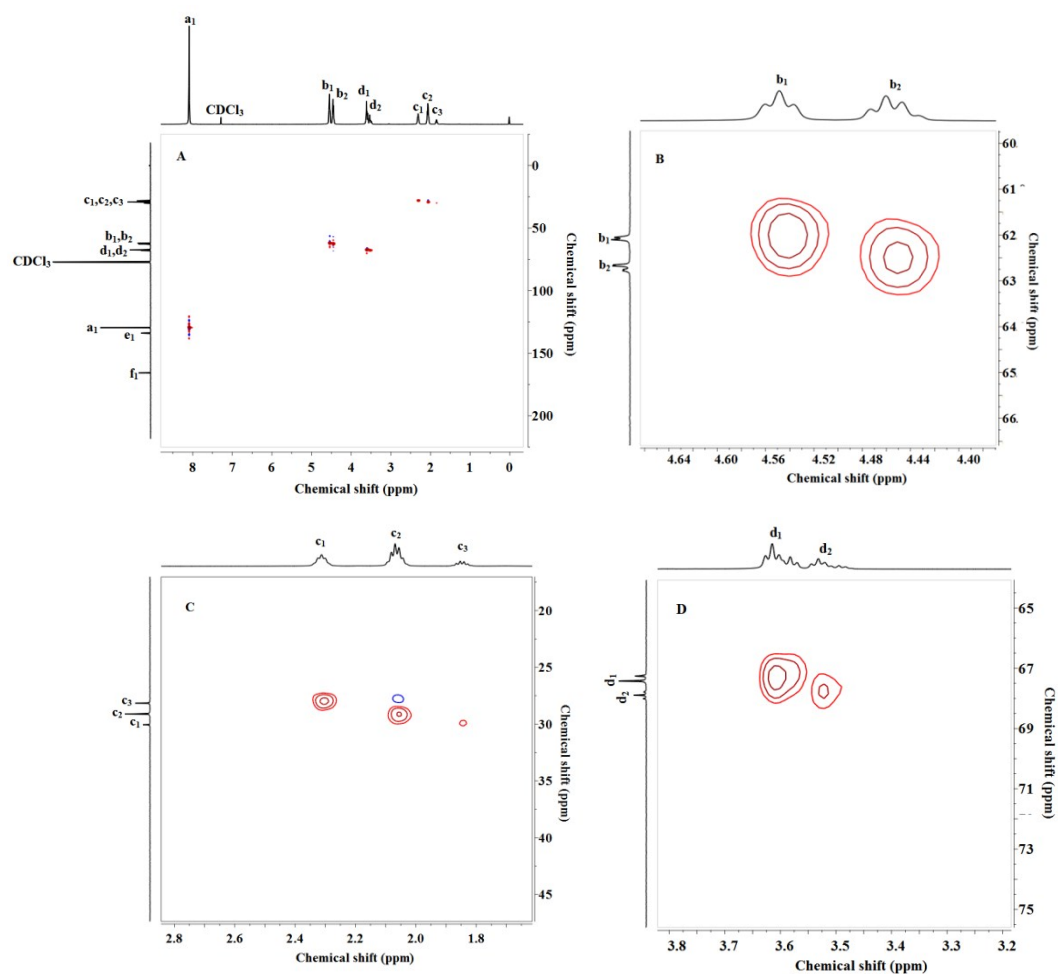

**Figure S7.** Two dimensional  $^1\text{H}$ - $^{13}\text{C}$  gHSQC spectra of P-3 . (A) the whole spectrum; (B-D) the selected enlarged correlated regions.

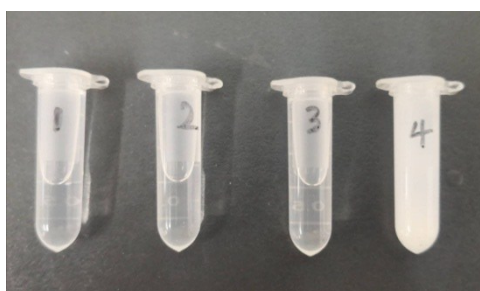

**Figure S8.** The images of the equimolar mixture of TPT and ESA (1), TSA (2), PheSA (3) and STSA (4) in water.

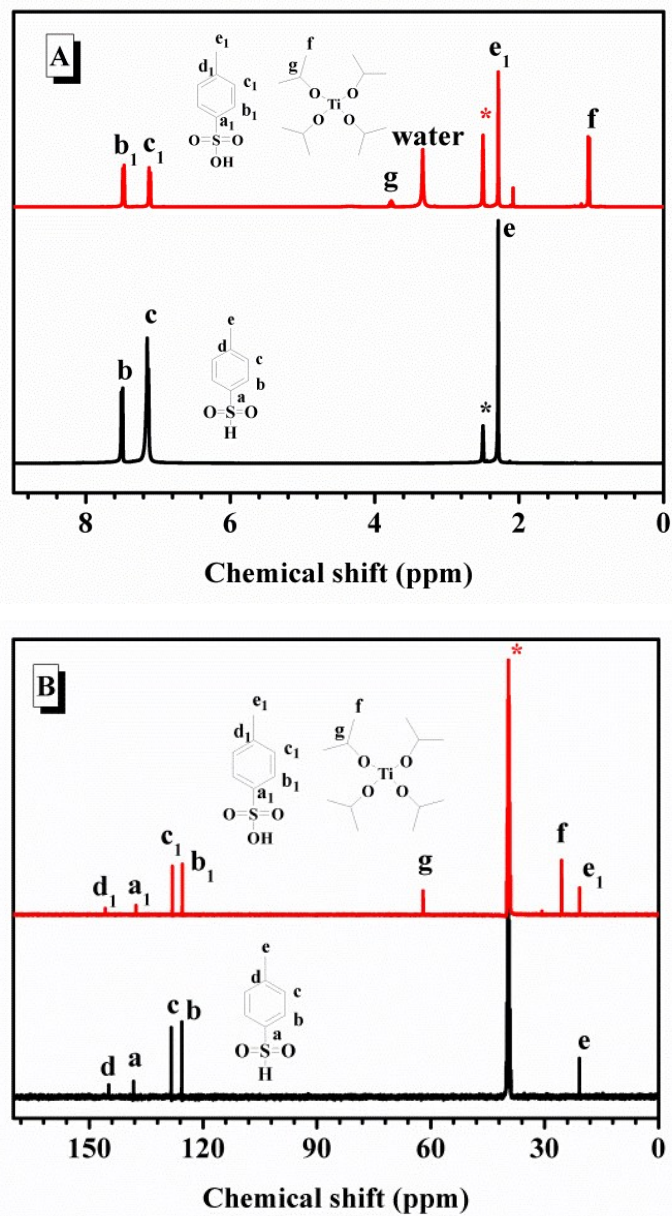

**Figure S9.** NMR spectra of TSA and the mixture of TSA and MSA with feeding ratio of 1 to 1. (A)  $^1\text{H}$  NMR spectra. (B)  $^{13}\text{C}$  NMR spectra. The peaks marked as asterisk were dimethyl sulfoxide- $d_6$ .

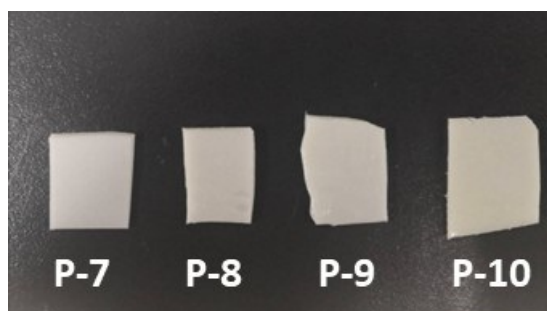

**Figure S10.** The pictures of copolymers P-7~P-10.



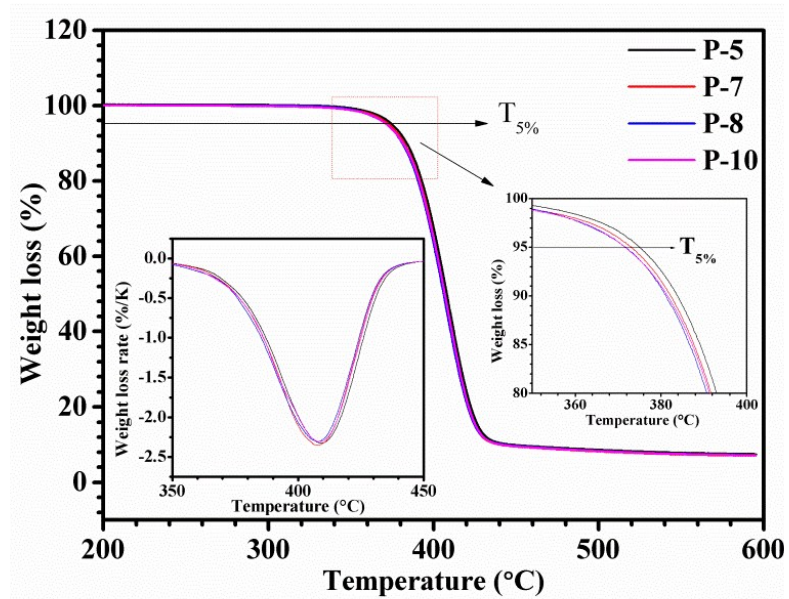

**Figure S11.** TGA and DTG curves of PTT-*co*-PDPT-*co*-PTrMOT copolymers obtained via different sulfonic acid. Inlet is the corresponding DTG curves and partial magnification of the TGA.

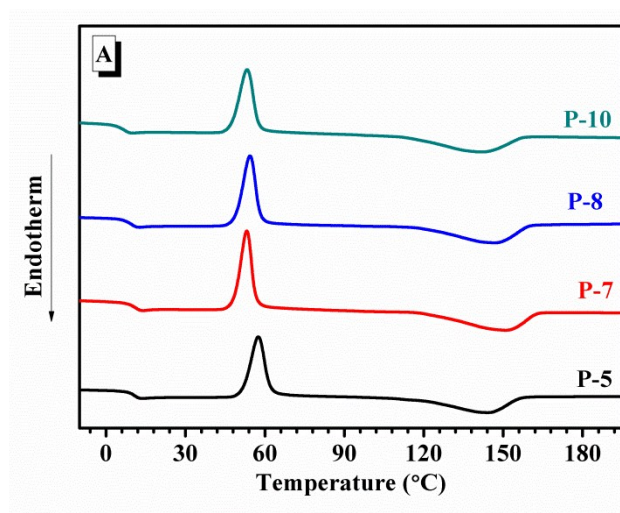

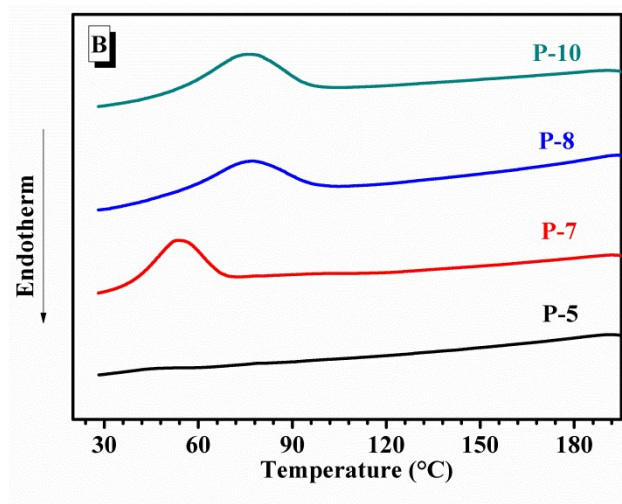

**Figure S12.** (A) second heating curves of PTT-*co*-PDPT-*co*-PTrMOT copolymers obtained via different sulfonic acids. (B) cooling curves of PTT-*co*-PDPT-*co*-PTrMOT copolymers obtained via different sulfonic acids.

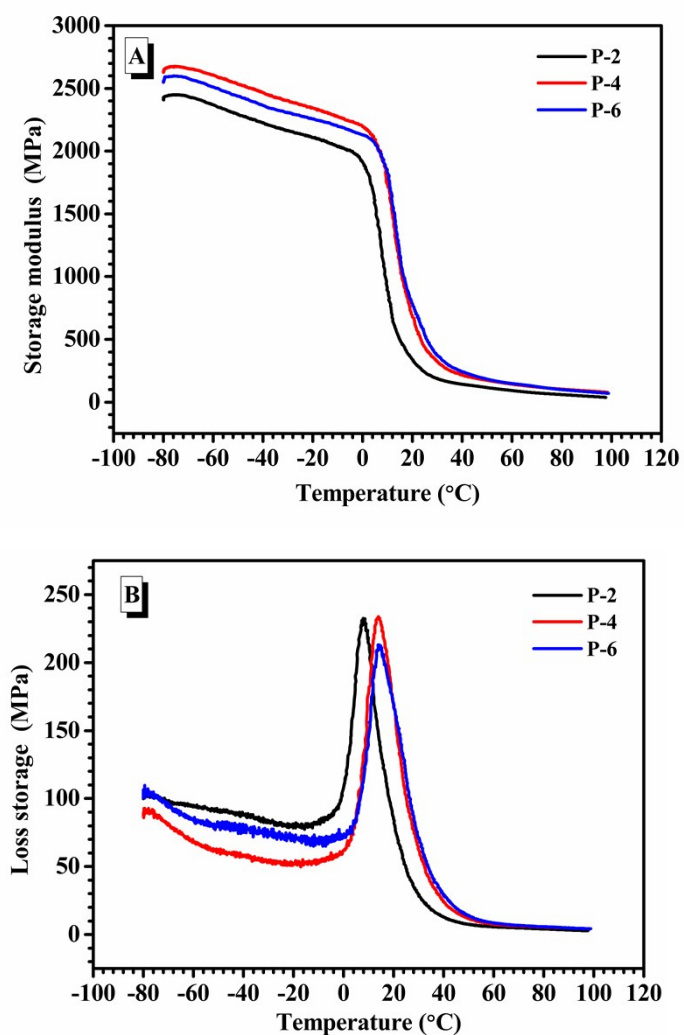

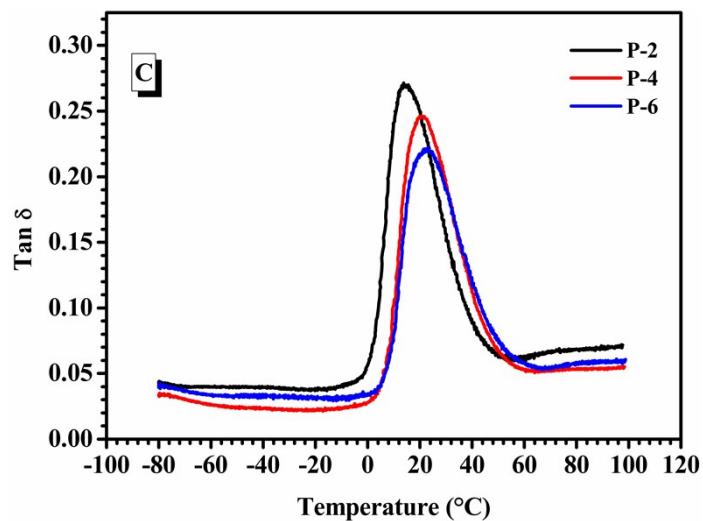

**Figure S13.** DMA curves of the copolymers. (A) Storage modulus curves. (B) Loss modulus. (C)  $\text{Tan } \delta$  as a function of temperature.

**Table S1.** Glass transition temperature of PTT-*co*-PDPT-*co*-PTrMOT copolymers

| Sample | PTT:PDPT:PTrMOT<br>(wt%) | $[\eta]$<br>(dL/g) | $T_{g,DSC}$<br>( $^{\circ}\text{C}$ ) | $T_{g,DMA}$ |
|--------|--------------------------|--------------------|---------------------------------------|-------------|
| P-1    | 100:0:0                  | 0.57               | ---                                   | 79.7        |
| P-2    | 39:50:11                 | 0.60               | 5.8                                   | 14.2        |
| P-3    | 55:40:5                  | 0.75               | 14.3                                  | 38.1        |
| P-4    | 47:46:7                  | 0.82               | 10.4                                  | 20.7        |
| P-5    | 46:46:8                  | 1.06               | 10.3                                  | 30.3        |
| P-6    | 45:48:7                  | 0.88               | 10.4                                  | 22.6        |
